# Supplementary material for: Doxorubicin-induced DNA Damage Causes Extensive Ubiquitination of Ribosomal Proteins Associated with a Decrease in Protein Translation*
Source: PubMed Central journal article supplement (PMC6283304; doi:10.1074/mcp.ra118.000652), 2018-02-08

**Figure S1**

**A**

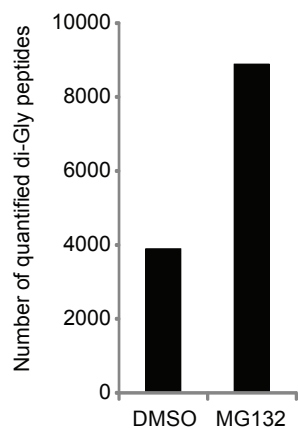

**B**

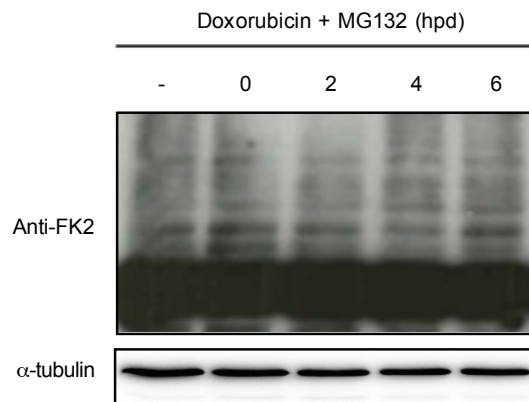

**C**

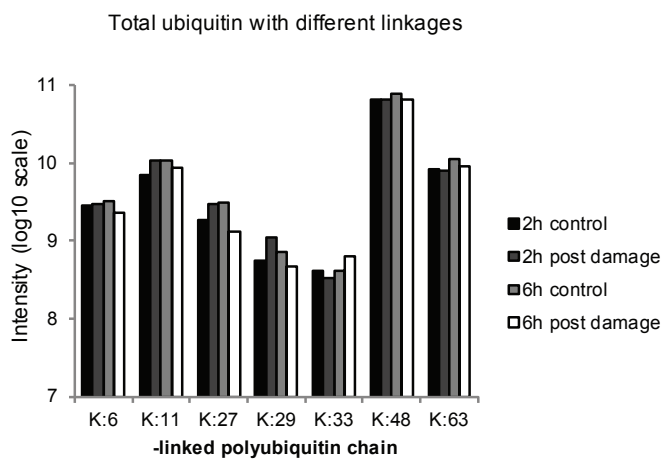

**D**

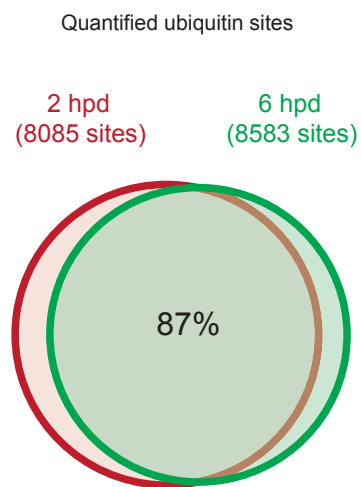

Supplement: 135740_0_supp_70435_p3qzd5.pdf [file 135740_0_supp_70435_p3qzd5.pdf]
