# Supplementary material for: Doxorubicin-induced DNA Damage Causes Extensive Ubiquitination of Ribosomal Proteins Associated with a Decrease in Protein Translation*
Source: PubMed Central journal article supplement (PMC6283304; doi:10.1074/mcp.ra118.000652), 2018-02-08

Figure S3

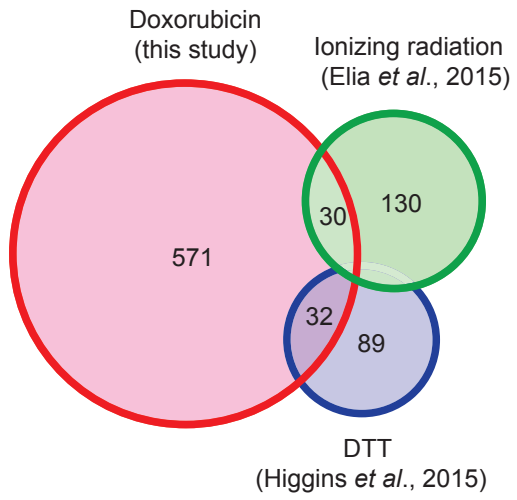

Supplement: 135740_0_supp_70437_p3q6d5.pdf [file 135740_0_supp_70437_p3q6d5.pdf]
